# Supplementary material for: Genome and proteome of the chlorophyll f-producing cyanobacterium Halomicronema hongdechloris: adaptative proteomic shifts under different light conditions
Source: BMC Genomics. 2019 Mar 12;20:207. doi: 10.1186/s12864-019-5587-3 (PMC6416890; doi:10.1186/s12864-019-5587-3)
Supplement: Supplementary file 1 — Excel file S1 List of insertion sequence (IS) elements and tandem repeats. (XLSX 100 kb) [file 12864_2019_5587_MOESM1_ESM.xlsx]

## Sheet: IS repeats and Phage elements
Supplementary Excel file 1 The Insertion Sequence( IS) elements and Tandem repeats
Start	End	Length	Name of IS Element or number of tandem repeats	Sequence
2152	2627	126	4	AAGAATCCCTAGCCATTCGGCGCCAGCAGTTAGGAGAGCGCCATCCCGATGTGGCCGCCAGCCTCAACAACCTGGCAGCGCTATATGTTGCCCAGGGGCGCTATGGCGAAGCCGAGC
3719	3773	22	3	GAGCCGGAGGCGAGCAGTCGTC
3728	3766	11	4	CGAGCGGTCGT
3737	3773	10	4	GTCGAGCGGA
4982	5070	42	2	TTCGCGGGCGTGGAAGCTTTGTTCGCCACTCTGGAAGCTTCC
4992	5063	21	3	TGGAAGCTTTGTTCGCCACTC
5072	5258	63	3	GCCACGAACCAAACCTCCATCAATGAAAACCTTTAGTCGCATAGATAAAATACTTGGTTAGAG
7205	7467	116	2	GGTCAATATCGCAAGCTATTGAATTCTATGAGCAAAGTCTTGCCATTATCCGCGAAATTGGTGACCGCCTAGAAGAAACTCGCGCCCATCAGGTTTGGGAGTTATACTAGGACCTC
19715	19746	15	2	TCAAAAAGGACTCAT
41217	41253	15	3	CTGTCTACCAGATAA
46229	46260	12	3	TGCTCATGCTCG
50673	50702	15	2	TGCGTATTCTAGAAA
67320	67344	11	2	TTGCCCATCTT
70127	70159	7	5	CACTCGT
95457	95510	7	8	AGAGTAA
95457	95517	21	3	AGAGTAAAGAGTGACGAGTAA
95465	95524	28	2	GAGTAAAGAGTAAAGAGTAAAGAGTGAC
95465	95525	14	4	GAGTGAAGAGTGAC
108571	108601	12	3	TTTCTTGCTGAA
113179	113207	14	2	AGAGCTAAGTTGCC
114386	114411	13	2	AAGGTCGCATGTC
121836	121861	13	2	CAGGCGGCCATAT
126093	126151	7	8	TGAAGGA
126151	126184	7	5	ACTCGTT
126151	126187	14	3	ACTCGTCACTCGTT
126193	126286	40	2	CACCCCATCACCCCTAAGCCCTGCGGGCAGGCTCCGCCTA
132126	132151	13	2	GCCGTCTCCTAAA
137077	137222	15	10	AGCAGCGCTAACCTC
137659	137714	15	4	CTCAGCAATGCAGAT
137764	137795	15	2	CTTAGCGACGCTAAC
140613	140647	15	2	AACGCCAACCTCAGC
140620	140672	14	4	ACCTCAGCACGCTG
140692	140762	30	2	CCGACCTCAGCTACGTCGAACTCAGCGACG
140693	140746	15	4	CGACCTCAGCTACGT
141090	141128	8	5	GGGCAAGG
144190	144263	18	4	CGGCGGTGGCGGCGGTGC
144190	144264	21	4	CGGCGGTGGCGGTGGTGCCAG
144218	144257	12	4	GGTGGTGCCAGC
151775	151823	21	2	AAAGGTGAGCGAACGCACCCA
151775	151907	43	3	AAAGGTGGAGCGAGAGCACCAAAAAGGTGCTCGGATCCACCCA
157242	157284	13	3	GATTGAACGGGTT
168385	168413	12	3	AGAGGACGATTA
172903	172933	7	4	CTCTTCA
183950	184001	8	7	GTGGGAGA
183950	184001	16	3	GTGGGGGAGTGGAAGA
183956	184022	24	3	GAGTGGGAGAGTGGAAGAGTGGAA
183956	184022	8	9	GAGTGGAA
197085	197124	21	2	CCTCCAATCAGCGAGAAGACA
204142	204169	14	2	TCGGTAAAGTCTAA
211171	211199	15	2	CCACTCAGGTCTGCT
226046	226089	16	3	AGTAGAGCCAAGCAAT
234116	234142	7	4	CCTAATA
237345	237380	18	2	CCTGCAACTATAGACATT
237371	237412	14	3	TATAGGCATTAAAG
250757	250784	12	2	TTAGCTGTCTAA
255476	255514	11	3	TACTAATCGAC
255494	255518	11	2	ATCGACTACTC
266283	266320	7	5	AATTCAA
289811	289841	14	2	TCCTGTTTTGAAGG
303985	304009	12	2	TTCAGCCTTGGG
324011	324036	7	4	TGAGTTT
329016	329063	16	3	AGCAGAACGACCCACG
349964	349997	6	6	CTCCGG
349964	350000	12	3	CTCCGGCTCCAG
355381	355414	7	5	CGAGTAA
358319	358352	16	2	TTGATGCCTTAGAAGA
379237	379279	15	3	AGTGCCGCCATCACC
397097	397122	13	2	AAATGCCATAACG
397364	397501	63	2	CGGGACCCATAGATTTCTCTCTGGGACGCAGTCATTTTTACCCGGTCCTTGTCCATAGCTGGG
397923	397960	15	3	CCGGAAGAACCGCCC
413515	415744	2229	ISKra4-ssgr-ISMich2	tgtggaaaatgtctttagcggccattgtttagtctcagaacaaatgactagcgtttccgcatcagcgtggtgggatagcagtcaatcacgaagctgcgcatgtagctcccttttgaatccgattccaggagtccttcataggtttctttgggaacttcggagtattggtaggtttttccggagttaaagataaccagtagggtttcgttgtcttcatcgtagccaaaggcttgaatcatgctggattccacaaactgtaactccatcaggcacagactcccttacgaaaatgctaagggaatcttgcgctggggtgcgatcgcgagtcaagtgaggcttgctcaatggatttgaagcggcggctggttgagcaccagcaattctggaaccatgccccgg…
428599	431742	3143	IS630	ggaggaatacggcatcagccagtacagcctctcagttgcgatggatgtagaacgcaacaatgttcatcgctgggtcaatgagaagcgtgaccccacggctgagacggtagtggagatcgttcgagcactgaaaaagctcaaccccgaagcttcaaaagcctttgttcagatatatctcggcgacgagcagtagcaagtaggttgggtggagcgaacgcgcaacccaacaccccatgtagctttggcaacttcagtctaatccaccgtggttgggtggaacgtagtggaacccaacaccctcaaccacagcgtctcctactcatacccaatcttctcatcaaactcaatcgctccacccgcaccccactctgccggataacccccatctttgacatagcg…
431125	431158	17	2	TGAATAAATTGGGTGGT
446870	446904	12	3	CCAGCCAGGACA
451834	451994	43	4	GAGGCTTTGTTTTCTGCCGTGAAGGCTTCCTTCGCCACCGTAG
461906	461955	21	2	AATTGTGAGTGTTGAATGTTG
461918	461965	21	2	TGAATTTTGAACTGTGAATTG
483428	483491	33	2	ACCGCCCGACTCGCTAGAAGACCCGCCTGCGAT
497561	497734	71	3	GTTTCCGTCCCCTTGCGGGGTAATGGATTTTGAACAGTCACTCAGACTTCAGATGACACTAGCGACCGAAG
511204	511252	7	7	GCGGAGG
511204	511253	21	2	GCGGAGGACGGAGGACGGAGG
511205	511252	14	3	CGGAGGGCGGAGGA
529328	529409	27	3	CCTGATAGTTCAAGTCGCGCCTATGGG
551179	551209	15	2	GATTCAGAGTGACAA
569678	569702	13	2	TAATCTAGCCTTT
626908	626936	14	2	ATTTCACGTTCATG
633352	633377	13	2	GAAGCTGTCTCCA
633511	633540	15	2	GTTAGGAGACATTGC
641314	641343	14	2	AAGGCAGACGACAG
652995	653029	12	3	AGCGGTCTCTGA
664237	664263	13	2	AATCGGACATTGA
667600	667635	15	2	GAATCGACCTCGGGG
696012	696436	126	3	AAGAATCCCTAGCCATTCGGCGCCAGCAGTTAGGGGAGCGCCATCCCGCTGTGGCCCACAGCCTCAACAACCTGGCATTGCTATATGTTGCCCAGGGGCGCTATGGCGAAGCC
696012	696487	124	4	AAGAATCCCTAGCCATTCGTCGCCAGCAGTTAGGGGAGCGCCATCCCGATGTGGCGCAGCCTCAACAACCTGGCAGTGCTATATGTTGCCCAGGGGCGCTATGGCGAAGCCGA
696023	696487	252	2	GCCATTCGGCGCCAGCAGTTAGGGGAGCGCCATCCCCATGTCGCCGCCAGCCTCAACAACCTGGCAGGGCTATATGAGGACCAAGGGCGCTATGGCGACGCCGAGCCCCTCTA
697579	697633	22	3	GAGCCGGAGGCGAGCGGTCGTC
697588	697626	11	4	CGAGCGGTCGT
697597	697633	10	4	GTCGAGCGGA
700640	700680	21	2	CACCAAAAAGCTGCACGGGAC
726327	726383	13	4	CTGTTAAGGCTCT
726522	726551	7	4	GAAGGCA
726623	726665	8	6	CTCCCTCT
726623	726670	14	3	CTCCCTCTCTCCCT
730004	730098	7	14	GAAGGCA
734423	734450	13	2	GATTGTGTTGAAG
754042	754095	7	8	CTCTTCA
754044	754095	21	3	CTTCACTCTTCACCCTTCACC
778643	778690	12	4	GATGACTAACCT
792636	792664	11	3	AGGAAGGGATT
801374	801399	13	2	TTCGTTAAGGACA
805949	806038	41	2	GGGGCGCCCAGGCTATCGGTCGGGCGCACAGGCTATCGGTC
805949	806038	21	4	GGGGCGCCCAGGCTATCGGTC
823428	823510	21	4	AACAATAGCTGCTCACGTTAT
823428	823509	42	2	AACAATAGTTGCTCACGTTATAACAATAGCTACTCACGTTGT
823526	823566	21	2	TCGTTACACCAAAAGCTGCTC
832035	832238	105	2	GGGCGGAAGAACGAGGAGATTAGAGTAAAGATGCTCACAAATGATGAGCCTCTCACCATCGGACTCTTCCGTCCTCTCTCTTCCCTCTTCCGTCCTTCGGACCAT
837579	834428	3151	ISAs1	agagccttgggccgtcatcaccgatgaaccgcctaccttgcagacgctctggcgctacgcgttgcgtttcagagtagaggagctgtttttggatagcaaatcaggagctttcgagattgaagactcccgaatccgctcagcggtagcccttgagcgactttatctagtggccgctattgcactgctttatggaacaaccactggcatggcggttcagattgaaggccttaggcagcaggtagaccctcattggcggcgcggactcagctacctcaagattggattgcgctggcttaagggagtcgttcacaaaggacgacagcttctagagccgatagcgctgttagtccgtgacccagagccttgttttgcctccaaaaaagcggagcacgactatta…
857537	857580	12	4	TTAGTCGGACGG
874378	870921	3457	IS66-ssgr-ISBst12	gggctattgggaggccgaataaatcggccatggcctgttgcaccaggcgctgtgagggcgatacagactactgagcacaccgaccgtagcgacgactcgaggcccataaacgtgactagaaacaccggttggcaatttggcacgagtccgatgaccacactggggacagacccgttggtgcaagcgatattccttcacttgagggacgaccggtggcatctccacggtttgatgccgatagggattcgggtcttctccgctcaaggccgcaccacagttggcgcaggtctcgggataatgatcgctgatagtctcacacgcctcaggcgcaaacaaccggcgatggtggccgggatggccggggtgaccgcctcggcctcgacctcggttgcggcgacg…
879884	879914	15	2	ACTTTATTTATCGCT
882061	879064	2997	IS630	cgaccgatgaactcccccagctgcggcagatcttgcaacgcttggcggttctgggtcagcaatgttttgcttggcagcagttggaaccgtggtggcgtcagccgccgagggagattcctgaagctcccttagataacctgccccagccgttagcatcggcgcggatcgcggtggcctgggatcgggcctttagcttttactatcctgataatctggctttactgcagcaagccggggccgaggtggtgtattggagcccactgcaggatcagaccctgccggatgatatccagggactgtacttcggcggcggctttccggaggtatttgctgaagagctatcccataattgcaggctgcggcagcaggtacaggaggccgtagccagagggctgccga…
884762	884799	6	6	CATCTC
928902	928929	13	2	GGCTAGTAGTTAG
933025	933053	14	2	TCTGGCTAAGACTC
956656	956747	30	3	GACCCCTGTGCCGCCGATCCCTGCGCTGGC
956670	956759	14	6	CGACCCTGCGCTGG
959114	959142	14	2	AAGTTGTAAATCGG
975698	975744	15	3	TCGCAGGTAGAACCT
976807	976842	15	2	CTGAGGTTGGCACCG
979896	979925	15	2	CCCATCGCTTGAGGC
983032	983076	8	6	TGGGGTGA
998061	998768	119	6	CACCCTCAACAACATTGGGGCGGTGTATCACAATCTGGGCCAATATGAGCAGGCCCTGGACTACTACCAGGAGGCCCTGGCCATCCGCCAGGAGATTGGCGATCGCAAGGGGA
998061	998772	238	3	CACCCTCAACAACATTGGGGCGGTGTATCGCAATCTGGGCCAATATGAGCAGGCCCTGGACTATTACCAGGAGGCCCTGGCCATCCGCCAGGAGATTGGCGATCGCCGGGGAA
1001504	1001547	8	6	GGTGATGG
1002619	1002734	18	6	GTCAGAGGAATTAGAGGA
1002640	1002726	9	10	AGAGGAATT
1027741	1027775	17	2	AACCAGTCATACATAAG
1028444	1028471	13	2	TGCGATGACAACA
1061498	1061525	12	2	ATGGCCGCCTCC
1062402	1062440	20	2	GGGCCAGATTGTCCGCCAAT
1072191	1072239	16	3	TCCAGGCTCTAAACTC
1089354	1090268	102	9	CTCGTAACGGCCTAAGTCAGCCAGGGCATTGCCTTTGTTGTAGAGCGCTTCGTGTTTGTCAGGTTTGATTTTGAGGGCGGCATCGTAGGCGGCGATGGCAGC
1089354	1090268	306	3	CTCGTAACGGCCTAAGTCAGCCAGGGCATTGCCTTTGTTGTTGAGCGCTACGTGGTCGTCAGGCTTGATGTTTAGGGCGGCATCATAGGCGGCGATGGCAGCCTCGTAAC
1095069	1095098	15	2	CCATGACTATGGCCA
1100431	1100462	7	5	AAGGCAG
1102402	1102469	34	2	GAATCTCACCAAGGAAGACCTCCTGCGATCCCAA
1103465	1103495	7	4	AATTCAA
1106776	1106885	21	5	GCAAGAGCGCCAACGGGCTGA
1119442	1119466	13	2	GATAGTATCCAGA
1128252	1128277	11	2	ACTCAAAACGC
1132614	1132639	13	2	TGATTGACACGAG
1134642	1134669	14	2	CATGAGCCTATTTA
1141119	1141143	13	2	TATGACACGCTAA
1166259	1166298	8	5	ATGGGGAG
1166307	1166334	7	4	AGTGAAG
1168069	1165824	2245	IS5-ssgr-ISL2	caactccacggcggtggccatgagcggggaatgcgctcggggacgctgtatacgccgcaaattgtgggctttgccaaggcggtggagttggccctggagacgatgactgctgaggcggagcgattgcaggggctgcgacagcacctatggtcgcagttgcaacccctgcccgctgtgcggctcaatggccacccgactcgacggttgccgggcaatctcaatgtcagtgtggctggggtagacggtcaggccctgctgctgggactgcgtaccatcgccgccgtgtcatcgggggcagcctgtagttccaccagtacagccccctcccatgtgctcaaggccctgggccacagcgatgagctggcctatgcctcgttgcggtttggcatcggtcgcttc…
1187262	1187311	7	7	GTGAAGA
1199169	1199216	7	7	GAGTGGA
1199176	1199216	14	3	AGAGTGGAGAGTGA
1201194	1201245	26	2	ATTTTGCCGGTGCTAGTCATGTCGTT
1201755	1201789	11	3	CCAGATAGCCC
1223868	1223903	15	2	TGAGGTTAGCACCGC
1223990	1224028	15	3	AGGTCAGCACCGTTG
1224094	1224129	15	2	TAGGTTGGCATCACT
1235019	1235080	16	4	AATGATCCCAGAAAAT
1244106	1244145	20	2	TTCTTAGGTAAACAATCGAT
1245071	1242799	2272	IS4-ssgr-IS4	gggatagtcatccaagaatgatgtccgtcccctccggtcagtgccgtctattgcgcagcaacttattggcccaagccacatcttcacccgtcagggggggaaccgggtcttgactgtagtcaattgccaagtcatagctagcccggtcgtatagctgagccaacaatggttgcaattccacaataatttctgggtcttgaggctggagcggcaggggaaaggcgggaatctgcgatcgcaaatcaaatggatacagatccgcgcgaggtcgctgatcggcacagctgatcaaaattcgatagagggagggttgctcggggccgcgcatcggcagaggggaaaaggctcgaatcaaatcaatttccactagatgggtctggctggccaaaattttgaggc…
1257117	1257141	8	3	GGGGTGAG
1276500	1276529	15	2	TCGCCAATGCCCCCG
1299810	1300104	14	22	TCTGCCTTCTGCCC
1302574	1302682	21	5	GCTCGGCCCGCTGTCGCTCCT
1320392	1320428	12	3	GGCGGCTTTTGG
1322169	1322202	17	2	CAAGCTAATCCTGAGAA
1347815	1351030	3215	ISL3	aaggaatcagattaggatcattctcaataatgagacaggcagaattagcaatctgagttaatgctgaccagacattccaagttgggcagcgaggcacagccagtatgcgctgctgcgaaccgtctactaattgccaccgggtatcggctggttgtacccgatacacccaatatcctggctgatataaatactgatgtaaaacttgtgtctgaaagagcttcgactgtttcaaagcttcacaaagaactccaatatcagattgctctagttcagaactttcacaaaattcgtttaatgctggaagaatctgcggtaatgtccctttcgttgccagaattgtattccaagccctgatcatttcagtatcgttgcttggcgtttgcgagcttccattgccag…
1426558	1426582	7	4	AGAAGGC
1428685	1428715	13	2	GGCTGATGGTGCT
1437064	1437102	14	3	GGAGGACGGAGAAC
1437076	1437116	21	2	ACGGAGGACGGAGAATGGAGG
1437149	1437180	7	5	AGAAGGC
1441406	1441449	15	3	GGTGCCGATCTCAGC
1464352	1464379	14	2	CTAGATAGAAATTG
1475220	1475244	7	4	AATTTTG
1475421	1475481	14	4	ACTCAAAACTCAAA
1475430	1475481	21	3	TCAAAACTCAAAATTCAAAAT
1475437	1475477	7	6	TCAAAAT
1475562	1475591	7	4	ACTCCTC
1486381	1486414	7	5	TGAGTGT
1514659	1514686	14	2	TTGTCTGGATTAGA
1514722	1514750	14	2	ATAGATTTCAGGAG
1524765	1524799	18	2	GCGTCATCAGATATCTAT
1539274	1539313	21	2	CCACTTCAGCTTGCAGGGCCT
1551699	1551726	6	5	CAGAGG
1557559	1555122	2437	ISL3	aaaagaatgccagacaagtgaaaaatttaggctctcctggatagacggtgtctcatgtatactgaggcacaaacacaatcacaagagaaatggactttcatttagaacgattgctcaattttccaaatgtaaccatagagaggtgtacggagactgacaatgaagtgcatttgggtctgagatggctcaatcagtctgtaccttgccagttttgtggctgtgaaacagataaagttaatcagcatcgtccactgcaagttcgcgatttgtcaatcttgggaaaatttacagtactgacaatcgagcgtcgccagtttaagtgtgaaaactgtcagaagtactttacagaagcgatagattttatcgatttcgaccgccattcaacagagcgtattcata…
1558207	1555511	2696	IS1	tctacttagaataggtatttttgacacgatatccgtgacttatttaactgagttgattagtgaatttatcaaatttaatccaggcgtaaaaatagagcaactgaacgatagcagcgtgccaaagctaaagagtttgctagataaaggagaaattgatcttattatctgtgtcttacaagataatgaaataaaaagctcgtcgtctaccctttttcaagaagagtatttacttgcagttgccaaagatcatcctctagcagagagaaaatcagtatctttagaagtcctgaataattattcttatatcgaccggagtgaatgcgaaattcgaaatcagttgcaggaattattcgcatccaaaaatatttgtcctaaaattatttatcagtcgccttctga…
1559278	1562733	3455	IS66-ssgr-ISBst12	tattcacggctctcctggttttagggtgagagaggttcagtaaggatacaaaaatcttgctgttgaaatattgaaaggcttgctgtgaaaggctttcaggattgatccgttgtactcgtcaccatggatccaagagagccctattcaccagcttgaaatgagagcctgaatcgctgtttgcgcagctgtcagtgattgctgtcgggcttcatctcccattgtcaaattctcagcgtggataaaggtgatatcagtaatcccaatgaacccaaagattgcccgcaggtagggttcttgaaaatcgagatgtgctgttggcgtgctagccgagtaactgccacctcgtgctgtaatcaccagcattttcttatcttttactaaacctttctcgccatctgc…
1560172	1560212	22	2	GCAAAGTCTTACTGATTTTTCA
1564628	1567780	3152	IS701	aggcgcgggaaccaatactctagcgctagctgctcgatgtttgctgccagattaaagggagcaagaaggctgtagcctgccgcagcgatgaggataaataggggaatggtcaaaagagcactccagcagcctgcccagactgctctagctgcatgcgttttgcgtccaccgccaaaggtttgagcgacgatagtctggacgaatatccccacgccacttaaaagcagcaggaacaaaaagattaactggtaaactgctcccatggcagcaatagcatcagtagaaatgcgtccggcgaaccaggtgtcagcgatgttgaggaacgcttggacaccgttgcttaaaaaaagcgggagggctagaacaatgacagcgcgatgatcgagccgatgcctgcct…
1568485	1568517	9	4	CGAGACGAA
1581405	1581592	78	2	GATTTCTAGCCCTGGTTATCCGGCCCTGGGGCCGTGGCTAAGCCTGCGGCACGCTGCGCTACGACTCCCGCCATCGGT
1596522	1596606	9	9	GGTGAAGGT
1632918	1635893	2975	IS630	gacatcggttgaatactgcttgacttccgtcgagaagtagacaaacgtatcgatgcagccaatgaagatgagtgcgatcaaaatgccatagccctgcaggtattgacgagccatggcataaaacaagaccagcgttaacagccctgccagcaagggaaacagccgcagggcatattcattcagacccaagatctgagtggcaagcttttcgagaaacaggaagccaaacggtgccccttggtcatagtcaagtggctttagtaactcggtgtaagtgcgattgccgatgttcaaggccaagacggcttcatcggcccatagggagcgattgaacccatattgaatcactcgaaccgcaccgctgacgccaataatcaaccaggcgatgcgctccagggc…
1640743	1640769	12	2	CAATTATGTATC
1650316	1653361	3045	IS5-ssgr-IS5	gataacgccttggcccgtgcagcaggacatcgcagggcactcgcaagcagtagtgccaactgctcgcttgcaaccaactcatcaagtcgtggttggcaaagcctcggtcggccagcagcattaggttcgggtactgcctcaaaagccaccgggcacggcgcagcaaagggcggtattcttcaaaagccaccgttgcactgccatgctcaagcactcgccacagtagcgggactgctcgtccgcagcacaccactgacaggtgaatcatgcagtattggttccacagcaccgttgtatcgagtgccagatacagccgcttgccctcccactgcctcagcgtcagcagcaccagcggtaggtagagctgatttatctcaacgagccggttgccgaaaaatc…
1661766	1661797	16	2	TAAGAGAGTTGGCTGA
1700353	1700379	13	2	TGGTGAGCTGTAG
1701695	1701737	17	3	CTATATCTATTTGCCCC
1726495	1726529	14	3	ATCAGGCCGTTCTT
1734739	1734766	14	2	ATCAATGCAGCCTT
1737208	1737241	14	2	AGATCTTAGACATA
1750407	1750438	16	2	GTTTTTCCTTGCTTGA
1750622	1750648	12	2	GGAAGACACACA
1753794	1753819	12	2	CATCTAGTGGCT
1760281	1760305	12	2	TCATCCCACTAA
1768859	1768887	14	2	TACTTTAAAATCGA
1771829	1771869	22	2	TCACCCATCCACTCTCCACTCT
1771842	1771868	14	2	CTCCACTCTTCACC
1773643	1773674	7	5	CTGCCTT
1775753	1775833	21	4	CCTTTCTAAGATCTGCCTTCT
1778387	1778440	8	7	ATGGGGTG
1778654	1778725	7	10	AAGGCAG
1792107	1788806	3301	ISNCY	tggggcctaccctggctcttcggcctagatcctgaggtgtggcccctctatctgggcttgccctgggggctctcaccgggacccctacccaatctgcctctgccggtccccctgcacacccgggtgtgtccgcctattatttttgagcgctgtggcctcgccgccgcccacgatgaggcctatatcgaggcgtgttatcacagggtttgcgagaccatgcagcgccagctggatcagctgtttgccgaacaccagccagagggatgattttggcactgagtcaatcaggaaacacttggcagagtgaagatgcgcgagcagatcttaggataatctctgtgctcggtggccctggatagggacagtgagatagttccgtagaaacttaattgtgggtct…
1800145	1800173	14	2	TTAGAGAGAGTGCA
1818146	1818211	8	8	GATGGAGT
1818146	1818222	16	5	GATGGGGTGATGGAGT
1818146	1818223	24	3	GATGGGGTGATGGAGTGATGGGGT
1818226	1818262	14	3	TGGGTTTTGAGTTT
1818230	1818262	7	5	TTTGAGT
1818398	1818422	7	4	AATTCAA
1835275	1835327	7	7	GAAGGAT
1843557	1846047	2490	IS630	tgcttaaattcccgtaaaagctgcttaattttaggattgagagtatcagcgtcctcaatggtcggaaggtcacttacttgacaatcggtagcctggtccgtgggctgatgatttgaagcaaccataattgcaacctgattgcaatactaagtatagagggcagacgctgggattggaatgattctgatggatgtaaaaaactttactgtaactgtaattgtataactgtaatactgtaaacccgtgcctgttcaagacgacccagtgcctgtttaaacaaggctggctttgtttaaagacgaagcagttcctgttgaagacgaacttattgctgtggtttttgaaattccctcgttactggggagatggcctgatggagcgttgggctgtaaacctcgt…
1850423	1850605	42	4	AAGACGAAATAGTTCCTACTTAAACAATGCTGACTTTGTTTA
1874156	1874185	15	2	AATGATGTAAAGTAA
1880693	1880746	21	3	TGCTCGGCCCGCTGACGCTCC
1880709	1880757	21	2	GCTCCTGCTCCGCCCGCCGCC
1881436	1881469	14	2	GGAGGACAAAGGAC
1881445	1881469	7	4	AGGACGG
1885665	1885703	8	5	GGGGAGTG
1885731	1885770	7	6	AGTGATG
1885731	1885779	22	2	AGTGTTGAGTGATGAGTGAGTG
1885962	1885986	7	4	AATTCAA
1889171	1889243	7	10	AAGGATG
1889206	1889536	86	4	AAGGATGAAGGATGAAGGATGAAGGATGAAGGAATGAAAGGCGGGGAGGTGGGGTGATGGGGTGATGGGGAGCGGAGAGGTGGGGA
1889291	1889328	7	5	AAGGATG
1889378	1889417	7	5	AAGGATG
1889465	1889502	7	5	AAGGATG
1891008	1891077	17	4	CATGCCCCCTACTGTGC
1891008	1891077	33	2	CATGCCCCCTACTGTGCCATGCCCCTACTGTGC
1892275	1892306	12	3	GACGATGACGAC
1893018	1893118	9	11	GACGATGAC
1893036	1893118	3	28	GAC
1904126	1904165	20	2	CTTGCGCCATCATCTACTAG
1910396	1910439	15	3	TGCTAGCCAATGTAC
1915233	1915259	13	2	TGAAATCGCCTCT
1921935	1922086	36	4	GAACCAGAGCCTGTCCCGGACCCAAGACCTGTCCCG
1921938	1922073	18	8	CCAGAGCCTGTCCCGGAC
1945626	1945802	45	4	GGCATCCTTCTCCAGATTTTCCCGACGCAGCTGATCGAAATCGAC
1945660	1945892	93	3	TCGAAGTCGACGGCATCCTTTTCCAGGTTTTCCCGACGCAGCTGGTCGAAATCAACCTTACCAGACTTCTCGAGATTTTCCTGGCGGATCTCG
1955652	1955706	21	3	CAGTCACCACTGACACTCTGG
1964730	1964757	7	4	AAGGCAG
1964781	1964914	7	19	GAAGGCA
1966603	1966632	15	2	AGAGTCAATCTTCGA
1987684	1987725	13	3	ATAAGACAGTGCG
1989837	1989879	14	3	CGAGGGTTAAGGGG
2000118	1997861	2257	ISKra4-ssgr-ISKra4	tcgcaactcggcccaacctggtactccctgcccagtcgtttttagcctcgattacgctccagcaacagcatcatcagcaggctcaacaccacctgggttgcctccggctcactcagataggctgtctgcttgaccgtaaacttacgggaaagaaacgtgggctttttcgccagccgcatcaccgttgggccatcaaggcgactgaccagatagaccgggttaaacacaaagcccgtaaacatgccaacaatgggcacctctgcaaagagggagtcgaacaccttcacccagggattttcttcctggatagtgaagctcaccgcgtcaccgtcaaagatgtcatagcgggctcgccagatcgagcgccaaccgcggcgcttaacggcccctagctccata…
2000362	2000392	7	4	AATTCAA
2001478	2001517	21	2	AAGCCCAGCCAAAAGCCAAAA
2011354	2011406	13	4	TTTATAGACATCA
2059063	2061445	2382	ISKra4-ssgr-ISMich2	accgtcagccagctgtcaaagcctctgcccccgggcaggggcttttatagactacggctaggagccgcttctatggtaggtgtagggagcgaccgctgcaaaccatggccctagcccggctcgtaatcggtcgcctgcccctggtacaccccttcagatctaaccctggacgcgatgtcaatgcggtttacgtgaggagtcctgtggagttgatggatcagacagccattctacgcatcggcgatcagcccctacccctcaaggagttggtgtctcgactctaccgctatggtctagtacctgccttgctgaaggactgggtgatcgatcagaccgtggccaccgtcgatttgagtgaggccgagaagcaagccgcccaggaacagttcatccaagccc…
2060786	2060865	41	2	AGAAGACAACCTCTTCTAATTTCTCTCTACACATCATAAAT
2079313	2082255	2942	IS5-ssgr-IS903	ctacatgaccacaactattgtcagatgctgtgttttcttgtcaagcaaattgccagcactataacgctgcgcctgcattcgcctgtccgtaattgagttcagaggatatttggaaagtaccctgcaaccttgctccagactggattctgaccaacagagccatacgctctaaaacgcttaccctgcagggctttcagccgagttttcaaatgtcctctcaaagggacttcgatgtttcaacacgccatagacgatatggaggagtttacgcatcactgcacccaccgccgccattttacttttgccacgtttgagtaatcgctcgtaaaaggccttgagttcagggttgtagcgtgttgcacagacagcaggcatgaacaatgccttgcgcagccgagc…
2080422	2083206	2784	ISL3	cgcccacgggacggcgaggagcctctaagacctacagtgatacggcgatagcgacggtggcgaccctcaagagcttgtttcacttagccggtgcgtatttgcagccggacgtcaagctcagggctttgtggaatcggtgtttcagctgatgaacatacccttgccggtgcccgaccacagtacggtatcgcgccgattggcagccttatcggtggcgatgccgattcagcctgccggtggggctcgtcatatcgtggtggattccaccggtatcaaagtctacggggaaggggaatggaaagcccggcagcatggcgtgagcaagcggcgtacctggcgcaagcttcatcttggtgtcgatgaggcgaccggtgagatcagggtcgctgaggtcaccac…
2080861	2078490	2371	IS110	tcgagcaaactgggaagaatttcgctgtcgtgatagtcgtgggtggtgacctcagcgaccctgatctcaccggtcgcctcatcgacaccaagatgaagcttgcgccaggtacgccgcttgctcacgccatgctgccgggctttccattccccttccccgtagactttgataccggtggaatccaccacgatatgacgagccccaccggcaggctgaatcggcatcgccaccgataaggctgccaatcggcgcgataccgtactgtggtcgggcaccggcaagggtatgttcatcagctgaaacaccgattccacaaagccctgagcttgacgtccggctgcaaatacgcaccggctaagtgaaacaagctcttgagggtcgccaccgtcgctatcgccg…
2081253	2078888	2365	IS630	aagcctcaaccggatagctatcgggcttggccaattgaatcatgcggttgagcgcggcacactgcaagaagagttcaacggcctggttgtcaaagctccgagagcgaacatgccccccaaaggtgactttgaggcgaaacatcgtggtttcggccaacgaccgacgatgatagccgctctcttgcttccaggccgcccgtccaacctgctcaatgctctgcaaaatctggtctctcgggtgagtcggggtctcctcctggggccgacagggctgggcatcgtgtcgcggcggaatcgtggccacagcgctccgttgggcaatggcctcatggcaagcaaaggtgtcgtaggccccatcgcccgagacttgggcaatctcaccatcgatgccatcgagca…
2081864	2084447	2583	IS630	gcctcaccactgagcagaagcaaacgctggagcatctctatcaacaacccgagttgactgacgcgattaccttagcccaaggctttatcgaactggtgcgtcagcggctaccagaagatttggacggttggttggcgaaggcagccaatagctcggtcaaagtatttcagacgtttgcgaagggcctcaaggaagactacgacgccgtcaaagcaggtttgaccttggaggtgagcaatggccccgtcgaaggcctcaataatcggctcaaaatgttaaagcgacagatgtttggccgcgctgggctggatctgttagccaaacggttcattttgaccagttaaggatcacccaaagtggccaagagcccgaagttggcgtgaatcaggtgccgaagtt…
2083549	2081262	2287	IS630	ttccatgctatctacagtgctgcatctggtgtgccatgatggactaaaaatcgggctaaggcactgcgcttcttaatataaaatccgtttgaacaagcacgctcatgctaccgcctcaagccaccagtgatatccagttatcccacgcataaactcaggacggttcatgagcacccggcatcgatgagctgtgacggcttccaactcatctaaagactcaaagctgcggttggcaatggcctcgttcgtgagtggccagagtcgttctgcgggttggagttcaggtgagcgcgggggtagaaacagcaagtgcatcccgtctggaactgttaacttatgagtcgtatggaaactggcttggtcgagcaccaacactatgcgattagtggcactgacctc…
2133045	2133075	7	4	ACTCAAA
2137591	2137615	12	2	GCCTGTCGGTCG
2161524	2161555	7	4	CACTCGT
2164967	2165045	24	3	CTACCCCTGAGCCAGATAATACGG
2176337	2176396	26	2	GGGAAGTAGGGGAGGTGGAGAGATGG
2179924	2179948	12	2	TAACATAACGGC
2189350	2189392	14	3	TTCTGTAGCGCCTA
2191503	2191533	15	2	TACAGCCGGCATCGG
2200960	2200987	14	2	CTAGAGGCAACAAG
2201287	2201326	12	3	ACTGCCAAAGAT
2212957	2212985	15	2	AAAATGCTGAGATTT
2220345	2220376	15	2	TGGTCAGCATCATCT
2245745	2246992	639	2	CCGCCAAACCTCTGATGCCGCAAGGCGTTGAGCACATATAGCGCAATTCGATCGGGCGCTTCTTCGAGGCCGCCAAACCTCTGATGCCGCAAGGCGTTGAGCACTCTTTC
2245814	2246708	213	4	CCGCCAAACCTCTGATGCCGCAAGGCGTTGAGCACTCTTTCAACTCCGATCGGATTTCGGGCTTCAACCTACCGCCAAACCTCTGATGCCGCAAGGCGTTGAGCACTCCG
2265341	2265388	12	4	GAGGAGATATGT
2274848	2274876	15	2	ATGACCGGCTTTTTA
2275112	2275160	8	7	GAGTGGAC
2275112	2275160	14	4	GAGTGGAGAGTGAC
2275187	2275223	15	3	GAAGTTTTGAATTTT
2275191	2275223	7	5	TTTTGAA
2290779	2291003	21	11	TCGCGATCAAAGTAAGTCGCA
2291741	2291873	48	3	CAGTTCGACTTCGTTGCCCCTGCGGGGCCGCTACGCGAACACGACAAG
2291910	2291979	7	10	CTGCCTT
2296721	2296769	7	7	CTGCCTT
2301014	2301076	7	9	CGGAGGA
2301014	2301075	14	4	CGGAGGGCGGAGGA
2301262	2301291	7	4	AAGGCAG
2306144	2306186	14	3	GCCAAAGAGATAGG
2322639	2322663	11	2	TACGGAATAGA
2341026	2341071	16	3	CAAATTACACCGCATA
2347113	2347165	21	3	AAATGCTTAAGCGTTAAGAGC
2347160	2347211	21	3	CTTAAGTTTTTGGAGCCAACC
2360552	2360591	21	2	CTGGATCAGGTAGCGTCTCCT
2371417	2371458	13	3	GGAGTGGGGAGTG
2371417	2371461	7	7	GGAGTGG
2371452	2371501	24	2	GAGTGGGGAGGAGTGAAAAGTGAA
2371462	2371561	7	14	GAGTGAA
2371463	2371557	14	7	AGTGAAGAGTTAAA
2371653	2371692	8	5	CACCCCAT
2384855	2384888	17	2	TGCATAGATTCTCGAAA
2391891	2392007	7	17	GCCTTCT
2398219	2398268	15	3	TTCAGTACAGGCGGT
2398219	2398277	30	2	TTCAGTACTAGCGGTTTCAGCACGGGTGGT
2412706	2412733	14	2	TTATTTAGGATAAT
2413272	2413301	15	2	AACGCGTTTTCCCAA
2461912	2461939	14	2	TGTGAGACATGGGG
2470352	2470378	7	4	TGAGTTT
2475139	2475165	13	2	TAATCTTGACTCG
2475744	2475769	13	2	TCTTTCGAGCTAG
2488816	2488850	9	4	CGCCTTCGC
2488846	2488923	18	4	CTTCAGCCGGGGCTGCAT
2493589	2493630	20	2	TATCAGCGTCTCCTGAAGCT
2504343	2504380	19	2	TCGGAATATTAGGTGATGA
2512112	2515241	3129	IS4-ssgr-IS10	tactatcgggaaacggcccagcacaatatcttttgggccaacgccatcaacacccgcgacaggcggttaaagttggagcccgacgggaatggatttcgagccatcggtatcaaaaccttttgcaccggagccgtggtggcagaccgactgatttgtgccgccgcccaaccgggtaatccgctgcctgccatggttgtggttcctggcaatcgcgctggcctcacctataaccacgactgggatgtgttggggcagcgccgcaccgccagcggtagctttacctttgagaatgtgcgggtagagcccgccgaaatcctgggaccaccgccgaatctggagagtgccttccccaccgtgctgggggtaggcggcctgctggtgctgtcggcaatttttaca…
2538381	2538423	14	3	GCTAACAAGACATC
2539073	2539163	18	5	AGTCACAGATTGACAGAG
2543105	2543150	18	3	TCACCCAGCGACAACCGC
2558043	2558234	63	3	TGAGTTGGCTCAGGCGCAAACCCGCACTGAACAGCAGGTTGATACTCTAGCCCTGCGCATGGA
2561597	2561640	16	3	GGAGTGGGGGAGTAAT
2564103	2564134	7	5	CCTCCGC
2567328	2567470	62	2	TGGGACGCAATCATTTTTGCCGGTCCTTCTCTATAGTCAGACGGGACCCATTGACGTTTCCA
2585430	2585480	7	7	CTCTTCA
2585436	2585476	14	3	ACTCTTCACCCTTG
2585442	2585610	69	2	CACCCTTGACTCTTCACTCTTCACTCTTCACCCTTCACTAAACATCACCCCATCACCCCATCACCTATC
2585511	2585549	14	3	CACCCTTCACTCTT
2585519	2585549	7	4	ACTCTTC
2594575	2594608	15	2	ACCAAAGACACCACC
2595224	2595285	9	7	GCATGGGCG
2605929	2605954	13	2	AAGATGACATGCC
2614574	2616908	2334	IS630	gggcctgcaattggtgatgacacaactcaaagaaggctcgcaatttgcctagcaaaatcggcatttctccgataccgtacagcaacgactccgacacctcgcccggtgaggctaatcggtaaaacttccagccttcaccattggtaacgatgccatggatatcgatagcctgtcccagctgacaatttacccactggcaggcttgcatctccactaggcactgggctgccccttgctcaaaatcatctttcttagcttcgatgatgcacccaaatggggcttccagataggctcgacgctctgcgatcaaataatccacattgccgcagactgtttctccttccaggtaagctcccttccagacctttagctgatcaaacccctccaacccttcctcgc…
2620302	2620337	9	4	CCCCATCTA
2626831	2626909	14	6	TGTCGTCGTCTCAG
2629433	2629458	13	2	TGTACTGATCCGG
2654164	2654189	7	4	ACTCAAA
2687972	2688032	6	10	CGATGA
2687972	2688032	25	3	CGATGACGATGACGACGACGATCAT
2688004	2688046	18	2	ATGACGATGACGATGATA
2705624	2705655	11	3	AGAGCGTCATT
2723599	2725904	2305	IS6	ctctttctggcgcaattttgactgcaattcaagcgaagggcgtgtctgcgagcgaactggtgggaatggtgcaggtgctgcaagagcgagccgtgcagagtcaccctcgcgtagatacccatcccgttgttgacacctgtggtacgggcggtgatggcgcttcgaccttcaacatttcaacggcggtggcttttgtggtagccgcggctggcgtcaaagttgccaagcacggtaaccgctccgtcagcagcaaggcgggttcagccgacgtattggaggctctgcgcattgatttaggcgctagccatcaaagagtggaagccgctttggatgaagttggcatcacctttttgtttgcacctggttggcatcctgccttcaaagcggtggctcctatcc…
2732872	2732897	13	2	TCAATGGAACAAC
2734816	2734848	7	5	ACTCAAA
2735073	2735100	14	2	TCTCCGCCCTCCGT
2737399	2737430	16	2	TACATCTCTACTTCAG
2745618	2745660	21	2	GCCGCTCAGAAGACGCCTATG
2769480	2769511	15	2	TCCCCTGCCAATCAA
2774714	2774745	8	4	GGAGTGGG
2774822	2774895	7	11	CGGAGGA
2774822	2774903	14	6	CGGAAGACGGAGGA
2774822	2774898	21	4	CGGAGGACGGAAGACGGAAGA
2776752	2776780	15	2	GCCGCCAGTTCTCGG
2782896	2782934	19	2	CCGCTCACCCCACTAGCCT
2791501	2791713	117	2	TCGTTGCTGTTGGCCTCAATGGTCCTGGCACTGGATTCGACCAGGGCTTCTAGTCTGGTGAGGGCTTGGTGATGGAAGGCATCATAGGCCGCTTGCCGTTGTTGTACAGCA
2806510	2806534	13	2	TTTGGAAAGGAGG
2807950	2810440	2490	IS630	tgaggatcactttgatcttgatgaggagcaaatcaataatcttctcagtgttgtcatcatggctgcggggagacatcattcagcctggacgaacggttggcaattatctgaggtggcgacgaagcagagcatcaggctccatccacaagcgaaccaggctgttgccaaaagttggacagctttattgaataaactcaatctgccctcctccattgcgcttccctcaaagcctttccacttcaatcaaacagaatatgaggtcggcgttacccgcctggactgttttgaacccgatgacctggaatatcaacaactctatgctctggtggtgagggctctgaggctatgtgacagccgatcagtgcaaatcaaccatccttgaatctgtcaaagaccatt…
2808446	2811015	2569	IS630	attcgagggcgcaggttagcagtagaacacattttaggaatgctagcggctggcgattctgtggaaacgctactagagggctatccctggttagaacaggaagacatccaagcttgtctggtctacgctcatcgtctcattggccatgagcgggttgagcctctcctgatcgaggcttaaccatgaagcttttactcgatagctgtgtttggggaggtgccaaattacctttatctgaagcgggtcatgatgtcgtttgggccggggattgggatagcgacccaggagacgcagaaattctgctaacggcctatcaggaaggacgggtgctggtgacgattgacaaagactttggtgagttggccatcgtgcggggcaccccccactgcggcattattc…
2826640	2826669	15	2	ATTGCCGAACACATA
2827531	2827650	63	2	CGATCGCACCTACTCACGTCGCAATCAAAGTAACTCACGCCGCGATCAGACCTACTCGCATCA
2827541	2827640	21	5	TACTCACGTCGCGATCAAAGT
2827563	2827660	42	2	ACTCACGGCGCGATCAAAGTTACTCACACCACGATCGCACCT
2828514	2828555	7	6	CTGCCTT
2832141	2832281	38	4	GCTCAGGACAAGCTGCCTTCTGCCTTCCCTTCGGCTTC
2832267	2832336	7	10	CTGCCTT
2838090	2838116	7	4	CACTCAA
2838149	2838233	7	12	TCACCCA
2838149	2838233	15	6	TCACCCATCACCCCA
2838149	2838233	44	2	TCACCCATCACCCCATCACCCATCACCCCATCACCCATCACCCA
2848383	2848410	7	4	GTGAAGA
2848434	2848466	8	4	CACCCCAT
2848436	2848510	16	4	CCCCATCACCCCATCC
2848436	2848510	8	9	CCCCATCC
2863786	2863828	21	2	CTGCATTGGGCGCGGTAACCA
2863856	2863884	7	4	TCCGTCC
2869630	2872562	2932	IS5-ssgr-ISL2	cagcggaatccttggctcggcgcattcggggctattggggcgttgaaaataaggtacatcatatccgggatgtgacccagggagaagatgcttcgcgcattcgtatgcaccagttgccgcaaatcttcgccgtcgctcgaaacttcgcgctcaacctctatcgctccaacgagttcgccaatatggctcaggctgaacgactctgcaagtttggtctagataccctcaaggccatttttagaatgaaatagccctgctttgtagggtgcgttgctgaacagcaaacgcaccattttgtggggcatcctaacattaatccttgacctgccttctctcatgcccgactatcgaagacctgaaattgcaggtggcacctacttcatcacccaagtcacctat…
2876668	2876710	8	5	GGGGTGAT
2877033	2877067	14	3	GGACGGAGAGCGGC
2878020	2878050	16	2	GTGATGGGGTGTTGGG
2878073	2878107	8	4	GGGGTGAT
2878143	2878172	14	2	CTCTTCACCCTTCA
2878175	2878231	8	7	CCACTCCC
2879522	2879581	21	3	TGGCGTTCTTGCTCGGCTCGC
2883391	2883421	16	2	TTCCAGCCAAGAAGAT
2887051	2887079	14	2	AGTAGCGTAACGAG
2888543	2888578	18	2	TTGCGTTGGCTAAGTCGC
2894275	2894299	12	2	AGAGAAGACCTG
2896457	2896535	7	11	TTCTGCC
2917694	2917877	63	3	ACCAAGTATTCCATCTATGCGACTAACGATCTGCATTGATGGAGTATTGGTTCACGGCCTCTA
2924627	2921631	2996	IS1	tggactgtccacctctcccagcaatgatgaccgttgtggcctggccgaagatggcgtctggttcacccactacgacaacctccgggctcaggaacagctgctgcggcaggtcttcggcgtcgagcggctggcgctggtgtacggctggtcgatgggggcgcagcaggcctattactgggggacacactatgccgatcgggtggagcgaattgcggcgatttgtggcacggccaagaccactgaccacaccaaagtttttctggggagtctgcgatcggccctcaccgccgatcccgcctggaacgggcatcgctttgaaggcatccccgatcgcggctatcgggcctacgcccgcatttatgccagttgggccgcctcccaggcttactatcgggaaaa…
2936083	2937293	126	10	CATTCCCCCGTGCTCACCTGCCACAGACGAATGGTGGCATCATCACTGCCTGTCGCTAACCATTGCCCATCGGGACTAAACCCAACCGATCTGACCCAGTTGGTATGCCC
2936083	2937293	251	5	CATTCCCCGTGCTCACCTGCCACAGACGAATAGTGGCATCATCACTGCCTGTCGCTAACCATTGCCCATCGGGACTAAACCCAACAGATCTGACCCAATTGGTGTGTCCG
2936083	2937293	376	3	CATTCCCCCGTACTCACCTGCCACAGACGAATAGTGGCATCATCACTGCCTGTCGCTAGCCATTGCCCATCGGGACTAAACCCAACCGATCTGACCCAGTTGGTATGCCC
2940620	2940693	8	9	GGGGAGAT
2944656	2944680	12	2	CCCCGGTAGTGC
2952096	2952122	12	2	GCCTGCGGCAGT
2964650	2964766	60	2	CGTTCTCCGCTCTCCGTCCTCCGTCCTCCCCATCACCCCATCACCCCATCACCCCATCTA
2964677	2964707	8	4	CCCCATCA
2964677	2964806	68	2	CCCCATCACCCCATCACCCCATCACCCCATCTACGTTCTCCGCTCTCCGTCCTCCGTCCTCCCCATCA
2964737	2964775	8	5	CCCCATCA
2964774	2964848	7	11	TCTCCGT
2976620	2978978	2358	IS4-ssgr-IS10	aagactaccatgtaaaatatatggaattgagaaataaaatagccttagaggagaatcgtaaatgggaattgaggcaaaaggtagaaaagttccaaggcattggcaggttgatagagaaagtaaaaacagaggtaaaaacggcatttctaaaatcaattagatttaatcgaaagcaggctttcaaacagacctataaagggtttgctagaatcgcaaaacagccatatgcagcaaaaatacaccagccacatatagacagttggtatggagccccgttagatggaataagtctttggtgggctattgagggagcaaaagagaataacggtgtagtcctctatcctaatatgcttggtgaggatattgactttagtgtagaaagtgaaactagttaccttc…
3015793	3019192	3399	IS4-ssgr-ISPepr1	agatgcttcagtgtcgtttgtgtgggtgaatagtcataacaacttccgactttttgactcaaaggtagaaacagatggaagtatacagcgaggtagttttgtctccatctctcgtcgtcgattactactctcgaccactggaactaatgtctatcgaaagtcattaggaacccctcgacctcttgagatttccgtagatcattatcggcccggtagtattgagccagagaaatgtgatttgaggtctttagcacttcaggtgctcagtttgacgaaactgaattgggcttcgaccgattctttcacatctgagccaatcacgactaaatacgcaggaaatattgcatatctgactgctgcatttctgcgacaaagcgagccatttaaattacacccagt…
3043814	3043858	21	2	AGTATGTCGCAGCCCGATCAG
3043847	3043971	21	6	CGCGATCAAAGTAACTCACGC
3043860	3044009	63	2	ACTCACGTCATGATCAAAGTAACTCACGCCGCAATCAAAGTAACTCGTGCCGCGATCGCACCA
3044973	3045149	71	3	CTTCCCACTAGGTGGGAAACTAATTGAATGGAAACATTCGCGCACCACCCGGGGGTGATGATGACTTCAGA
3045661	3045731	7	10	CTTCTGC
3049972	3050057	15	6	ATCTCACCGGCGCCA
3063632	3063659	14	2	GTCGAGCACTAATA
3067576	3067603	14	2	CTCGTACCTTAGCG
3068940	3068993	21	3	TTCCCTCATCCCTCTTCCCTC
3068950	3068993	7	6	CCTCTTC
3073680	3073735	7	8	CTTCACC
3073680	3073738	21	3	CTTCACCCTTCACTCTTCACC
3090616	3090649	15	2	GGCCTGCTTAATCTC
3094376	3094403	14	2	TATCATTCGATCTA
3094992	3095025	11	3	TAAGCATTAAT
3097436	3097465	14	2	GTGAAGAGTGAAGG
3097509	3097639	8	17	GGGGTGAT
3097662	3097687	7	4	TGAGTTT
3104823	3104964	41	3	GAGATACCACTATCACCTTTAGTAACATAATGTTTTTTAAC
3104971	3105050	42	2	AGATACCACTATCACCTTTAACAACATGGATGTTTCTTAACT
3114679	3112281	2398	IS630	ggcgggcaccataatctcaaaaccatcttccccggtatagccggtgcgggccaagaatgccggttgcccccagagagtggcttccccatggcaatagcgcttgatggtagacagatcgatgtccaccaaggcctgcaacttggtcgccgcgtagggaccttgcaccgctagcagcacttgctctgctgagagatcttgcagctcaatggtgggctccagcgcttgacgcaaccaggccttatctttggcagtcgtggctgcattgacgatggtgactacccgctccccctggctatcatcctcctggcgatacaggagcagatcgtcaacaatgccagcctcaggggtcaacaatactgtgtattgagccttacccggttgcaggcgactcaaatctgt…
3130943	3131032	45	2	ATCTCTGCCTTCTCGATCTTCCTGGGGCTTAACGGTCTCTACCCG
3137813	3137841	15	2	ACAGCGGCCTTAGCC
3146931	3147078	24	6	ATCACTGCCAGGCTCACCCATAGG
3147097	3147126	15	2	GGCTGAGGCTGTTCT
3151299	3151327	12	2	TCATCAAATGAT
3174992	3175028	18	2	GCCTTAGCCGTAGATCTA
3192840	3192871	15	2	TAGCGCGGGCCCGAT
3211617	3211653	14	3	GATATAAGCATTTA
3249153	3249184	16	2	TGTATGCAACTACCCA
3275648	3278776	3128	ISAs1	tctcgcctgccctaataaaatttaatatcaagctagcaagagattctctatcgtctacatactttgagaaatggtagatactcttactcaaactcgggaatcgttccagaaaaacattcattcgcgacaaaacatcagttccatgatctcgcagtaatgctaaaaccaattctgcatccgattcatcaatgtctgcctcctttaaaagatttagtaagtattcaacttgttcagatgttaatttctcataatattcttcctcttcaaaagtaactcctccagaagtttcgaaaattgttcgtctaattttcagtaaatcagcttttaattcatcaactttcttagcaacatctagctcgctgacttgacctaatatggtttttgcagaatttagcgaga…
3279930	3277508	2422	ISL3	tcgcggctgtgcctttctcaattccaccgtcgagctggtggaccccaaccatcctggctatcaagtttccatgcagcatcaacagctcacctttgactacatcctgggattagtccaggcggctaatttatccgatccagaaggaataacccgacaggtgatgattatcatggaaggaactgtagtcattgctatgttgcagcattgctcaggtatcgcctgttgcggcaagcagatactctctactctgttagaacaccagtaagcaaccgggtccacaaattgcgtatctattagcagcaagctggtcatactatcattggcctgcccttgatttgagccttttgcatcatgccttccctacccacagagcgtatcacaacgtccagtaagacgcct…
3305067	3305100	12	3	CTGGTCTGGGCT
3319480	3319547	34	2	GACATAGCCAACTGTCACAATAGCTAGCTGTCAC
3319481	3319548	17	4	ACATAGCTAGCTGTCAC
3319492	3319551	17	4	TGTCACATATAGCTAGC
3324880	3324914	7	5	TGAAGAG
3324966	3324992	7	4	CTACTCA
3330175	3330202	7	4	TGAATTG
3343695	3343736	19	2	CCTGAGGGATTGTATAGAA
3354293	3354323	7	4	GAGTGAA
3354503	3354557	7	8	AAATTCA
3354503	3354554	20	3	AAATTCAAAATCAAAATTCA
3373533	3373557	12	2	CCAACATGGATG
3383948	3384006	18	3	GGCGTGGGAGTTGGTGTC
3383948	3384040	18	5	GGCGTGGGAGTCGGTGTC
3383948	3384021	36	2	GGCGTGGGAGTTGGTGTCGGCGTCGGAGTCGGCGTC
3383996	3384040	12	4	GGTGTCGGCGTC
3383999	3384040	6	7	GTCGGC
3395425	3395453	14	2	CGCCAGTCTGTCGA
3399794	3399829	17	2	GTCCTCGTTTGCGCCGA
3410512	3407892	2620	ISL3	acatattggaagaacagattcgaagcacaaggcattgaaggtattaaactcggctaccaaggatcaaaaagttacctaaccccagatgatcgtacagaaattatctcgtggctgagaaccagaaactactggaactttgatgaattagtttcatatttagatgaacattatgatgtgatttacaagtctaagcaaagctactatacacttttttcggaagcaggtattagttggaagaaatctcaaaaaaccaacccgaaatctgatccagctctagtcaaaaaaaaagagaagaaatccaaggatttatccgtcaaaaccagttcaaaattgagtctggggaattgattgtactttttttggatgagtgtcatctcctttggggtgatgtttgtggat…
3418465	3418505	18	2	GTGTAGGGCTATGCCCGT
3429080	3429117	7	5	AAGGCAG
3435508	3435585	7	11	GAGTGGA
3435508	3435585	14	5	GAGTGGAGAGTGAA
3435515	3435585	21	3	AGAGTGGAGAGTGAAGAGTGA
3435612	3435636	7	4	TACTCGT
3442964	3443028	18	4	CCAACGCCGACCGCTTCG
3465058	3465093	8	5	GATGGGGA
3469351	3469389	7	6	ACTCGTC
3469486	3469532	21	2	TCTCCGTCCTCCGTCCTCCGT
3469487	3469532	7	7	CTCCGTC
3472819	3472844	13	2	AGAACATTTAGAA
3480827	3480868	20	2	CCACCACTCTTCTCATAACC
3488551	3488583	16	2	GCCCAACTTGGTTAAG
3497415	3497455	21	2	GAGGCCTGGCCCGGTTGCAGT
3497459	3497483	12	2	CTGGCGGTGCTG
3501825	3501866	8	5	GGGGGAGT
3514963	3515014	15	4	CCCTGGAGACTCGGC
3517660	3517696	15	3	TGCCGCCTCCGGTTC
3518934	3518958	7	4	GAAGAGT
3519063	3519087	7	4	AGTGTTG
3519182	3519252	7	10	AAGGCAG
3519553	3519586	7	5	CACTCTT
3519554	3519586	14	2	ACTCTTCACTCTTT
3525538	3525578	21	2	TACTCTTCACTCTCCACTCTT
3525539	3525571	7	5	ACTCTTC
3538500	3538548	21	2	TCATCGCCGAGACTCTGGCAG
3557013	3557045	7	5	CACTCAA
3557104	3557133	14	2	CCCACCACCCTTTA
3557198	3557229	7	5	ACTCTTC
3576875	3576905	15	2	TTTTCGTGTAACCGT
3587324	3587350	7	4	CGAGTGA
3589923	3590100	84	2	TGCCTTCCCATTTATAAGCAATGCTTTGGCGATTCTAAGAAGGACGAAAGCCTTTCGTATACATGAGAACCCATTGCTTCGATC
3590860	3590915	18	3	GACAACCGCTCACCGAGC
3591253	3592040	126	6	AGAGCGGTTCCGCCTCGGCGTAGCGACCCTGCGATTAATACAGTGCGGCGAGATTGTTGAGGCTGAGGGCCACATCGGGATGCTCGTCGCCCAACAGCCGTTGCCTCAAG
3621335	3621365	15	2	GGATATCGAAACAGT
3651771	3651800	15	2	GATAGACACAACTAA
3687770	3687823	12	4	GGATACATCCGG
3688166	3688192	13	2	TATGCTCATTACT
3705843	3705876	17	2	GAAGCCGTTACGGAGAA
3706549	3706631	21	4	GAACAAGAACACCAACGGGCC
3713047	3713078	7	5	AATTTTG
3713152	3713204	7	8	TCACTCA
3742837	3742885	24	2	GGGCGATTCTCCTCCGCAGACACT
3748292	3748557	21	13	CAGTTCCCCCACTCGCGAACC
3748328	3748550	63	4	CGAACCCAGCTTCACCACTCACGAACCCAGTTCCACTGCTAGCGAACCCAGTTCCCCCACTGG
3749325	3749369	21	2	GCGATCGCATCGAAGGTGACG
3751163	3751194	16	2	CAGGAAAGGCTACGAA
3762841	3762880	12	3	GAATGACCTGAT
3786466	3786509	21	2	AGCGGGGGAACTGGCTTCACC
3793809	3793833	7	4	AACTCAT
3801224	3801252	7	4	TCAAAAC
3802327	3802366	21	2	ATTCAAAACTCAAAATTCAAA
3802329	3802362	7	5	TCAAAAC
3802329	3802366	14	3	TCAAAATTCAAAAC
3804771	3804808	12	3	CCCACCCCAACA
3804776	3804850	30	3	CCCACACCCACCCCAACACCCACCCCAACA
3804795	3804853	24	3	CCCACCCCCACACCGACACCCACC
3804807	3804841	12	3	CCGACACCCACG
3808809	3808892	12	7	GATTAGCAAAGG
3824822	3824869	7	7	AGGGAAT
3840731	3840764	7	5	TTCAAAG
3842526	3842563	12	3	CGCCAACGAACT
3864094	3864124	15	2	GATTGTCTGGATTTA
3865391	3862873	2518	ISL3	agccctgcagatggcgttggtctttgggctcgacccattgacgtaattggtcttccagttgacgataggcgtttccatgaggttagcgatagttggggaacttcagcttctcatgaaacaccctcttgttctatttgaggctccttatacagcagcactttcagcacttctctgcaccactaagggtctggctatccattacacaattgtgaagtcactgcttgctaagttcagccctccagagagcttggcaaactgcaccgcagcttgactacccgaaccgtcgatatcgaaggctagagaacctgtgttttggttatacatgaaacgatcgctggcattagtcgcaactgaacccaaaacaaattcagtagatcacaaatcctctcaagagtaagt…
3865500	3865547	24	2	TGTGAGCTATTTTCTCCGCAATGA
3865902	3863453	2449	IS256	cagtctgacttgacgcgaatcgaccagttccagtgatggcgattgagccaacgaatcaagtctccatgttcaaagcctcggtcggccaaaagcgtcacctgaccccctggcggtaaggctcgacgggcgcactccagcaccccgtggtattgctcgaaactgatggtggcactgcgatgttcaatcacctgttgggctagcgtgagcgaccgaccgccccaagccaagcacacctctatcaagcaccagtgattccacagcagagtcgtatccaaggtcaacaggacagcttccccagcaaacgcggacagcacatggcgtaacaagggcaggtagacccgttccgcagtgatctgctcattgcggagaaaatagctcacatcattgcggagaaaatag…
3877766	3877803	14	3	TTATATCCATACAG
3896174	3896897	126	6	TTGGGCGACGAGCATCCCGCTGTGGCCCTCAGCCTCAACAATCTCGCCGCACTGTATCAATCGCAGGGCCGCTACGCCGAGGCGGAACCGCTCTATCAGCAGGCCCTGGC
3896175	3896907	378	2	TGGGCGACGAGCATCCCCATGTGGCCCTCAGCCTCAACAATCTCGCCTTACTGTATAAATCGAAGGGCCGCTACGCCGAGGCGGAACCGCTCTATCAGCAGGCCCTGGCC
3897236	3897343	18	6	GCTCGGTGAGCGGTTGTG
3900018	3900043	13	2	TTTTAATGGCTAG
3929641	3929679	17	2	GGGATCGGGGCTGGCTC
3941259	3941285	13	2	CTAGATGAACTAG
3947373	3947404	16	2	GAAGCAAAGGGGCTAC
3947659	3947689	10	3	CTGATCTAGG
3949810	3949845	18	2	CCAGACACACTGACCAAA
3964953	3964987	7	5	TTCCTTC
3985155	3985182	13	2	TGGAGAGCTAAGT
3993155	3993185	7	4	AGTGTTG
3993203	3993232	7	4	AATTCAA
3994718	3994770	10	5	TTACGTCTGA
3997078	3997108	10	3	CGCTAACTGA
3998963	3998988	13	2	AGTTCAATGAAGA
4006667	4006696	15	2	GCCCCATCTTTCAGG
4018819	4018844	13	2	GAAGGATCTAGGC
4023445	4023473	14	2	ATACCAGCACTCAT
4024045	4024070	9	3	TTGCCTATC
4024724	4024777	15	4	CCTGAGCTGCCTGTT
4027149	4027173	7	4	AATTTTG
4027286	4027376	7	13	CTGCCTT
4038885	4038921	7	5	TTCTGCC
4045922	4048991	3069	ISKra4-ssgr-ISKra4	ccatcaagaaacaggccaccacagaaatggaatcggccggtgaactcagccgagagacctatgtcgaagccgttgaacgggctaagacgacactgcagcgagcccaagacttctttcaagaacaggaggcggccctagaaaaaacagctcgggacatgcaagacgaagccacccaaacctgggagacgttcgtggccaatctgacctccatgggcaatcggctcgatcgggccattaatgccgcctggagcatcctgacagaaccagaagatactcagaaagatgaagaccctccggctcaaacctaggtgctcacaaacctggcactctggtataactctgggggcgtgtcttgagcgacaagctgctccagcagtggatcaacttgcctggtccgaa…
4049187	4051512	2325	IS256	cggactgtattcgggtagaaactctaacaccaaattagacatctctaattttatcttttcaataaattcctccttttcatgaatactggcattatccagaatgatgactatcttaggactctccttctcgaaatcagcaatctctctaccctcactcacccactcatacttgacttcttcataaaatcccttaagaactttgtagaaattctctcctgtcccctttgccagaaagtcaaccagtcgcttcttgtctgaaaagcggactcctcccatcacacttaccctaccctttctgcggatccctgaaacctttttgcgacttccttttttggtccaaagttttcgacgaattactcttaaactaaagccacactcatcccaaaaccatacctgcag…
4049843	4052862	3019	IS4-ssgr-IS10	aacctctagcaataagtcaacgtattgatccgttgccttatgaaagtttcctttcatcctctcatcgatcaggctatctagattgcttgggtcgccatgcgtacaccaataggctacttttcttagagaacaaccaagaaaatcagcaatctcttgttgcgttttgccatcattgcgtagtagaagaattaaaatcctctcgcgaatatcaggatgctcatgggacttgagctgcttttgtaactcttgcttctcttctggcgttaagtagttcttgattggcatagctaacctacttgaatcataccttatgatacgtaatttagatgatgcctaacagcttatctacgatgcgcccacctataaagaggcccagcagcgcaaaaaagcctttgttga…
4051128	4048011	3117	IS630	ccagaccactggcaacgcccgtccccgatgcaccaccgccagacggagcaaacaggactggtcccaaaacatcgaggtgtctaagctcaaatagagtacgtcctcttgccagtcggctaaggcagcttgaatcagcggtttgtaaaaccgctgaacattgaggcgacagttatgcaaccaccgactgagccgtcgctgtttactttgcgcctgccaccctcggcacgggatatagggtagccaacgggttaagttcacctccccggtctgactcagagcgaccaccatccagagacacgtggtcagatgggtcaggtgagcccatgcattggattgacccatccaggatttcaaggcatggtagaggcgggaggttttttcacagcattcaggattgtg…
4051907	4051940	17	2	GCAGCTTTAACATCTAC
4053980	4050920	3060	IS630	ggcattgtcattgaaacacagtgtttttgaaggcgtgttaataacagttctaacatgggcttaaaggctatttgatcgaaactcgaaaaagatacaaaccctccttctttagtgacccgtctccattcttggagtgcagcaactacatcagaaagaaaaaaaataccagaagcgcagattaccccgtcaaattcattatttttaaaatttagggattcagcatctcccacatgcatttctacatttttaaagcccatagcttctatattttcttgcgacttttccagcatatttttagcaatgtcaatccctattacattacctgtagacccaacagattttgccgcagcaagggccgcaaagcctgtaccagttgcaacatccaaaatcttttgcccg…
4063889	4067526	3637	IS1634	caatagtgcatcaacaggatttacctattatgttgctcaaaagggagttactggaatgcgggagtctttaccagacggattaactgaaaaacttactaaattacgtgaatatattactactccgcttgccgttggttttggtatatcaaaacctaaacacgcaaaggctcttgccccttatgcagatgctatcgttataggaagtgcgtatgttaatatgtttgaatcatatcaaggacgtgaacttgttgaaaagatagagtcctttacaacttctattgtatctgaacttaaaaaataaacgttgttaatagtggatttacagctgcgacatggtgaaaaactagggttggtgtcaccagacgcaatctgaacttgaaatcattacaggctataggt…
4081450	4081502	15	4	GCAGTGTCTAGATCG
4081705	4081734	15	2	GTAATCTTTTGACTA
4092768	4092814	9	5	CAGTTAGGA
4102682	4102723	14	3	GACTTCGTATCTGA
4115640	4115682	16	3	CCTTCACCCACCCACT
4119624	4119659	15	2	GACAGTATAGCTACA
4121077	4121101	7	4	AAGGCAG
4122456	4122491	8	5	GGTGATGG
4130955	4130996	16	3	GAGGGGGAGATAGGGA
4130955	4130997	8	5	GAGGGGGA
4130992	4131025	7	5	GGAGAGC
4130992	4131032	21	2	GGAGAGCGGAGAGCGAAGAGC
4130994	4131048	21	3	AGAGCGGAGAGTGAAGAGCGA
4131001	4131046	14	3	AGAGCGGAGAGTGA
4131022	4131048	7	4	AGAGTGA
4147616	4147651	15	2	GAGGATGAGTGGTGA
4157153	4157186	10	3	TTGGGAAAAG
4160522	4160562	20	2	TCAGAGCAAATTGTGCATGG
4162034	4162215	21	9	GATCACAAGCTTGTGTTATGG
4162084	4162181	42	2	CTTGTGTTATGGGAGCAGAAGCTTGTGTTGTTAGATCACGAG
4174957	4174985	7	4	GTGAAGA
4190114	4190150	16	2	CTCCCCCACTCTCCCA
4191311	4191379	21	3	CTCTCCGTCCTCCGCCCTCCG
4191313	4191379	7	10	CTCCGCC
4191326	4191386	14	4	CCTCCGCTCTCCCT
4191327	4191386	28	2	CTCCGCCCTCCCTCCTCCGCTCTCCCTT
4205917	4205979	7	9	TCAAAAC
4205985	4206029	8	6	CCCATCAC
4205985	4206029	23	2	CCCATCCCCCATCACTCCATCAC
4210865	4210897	12	3	GATTGTCCTGCG
4215869	4215900	7	5	CACTCGT
4217531	4217556	8	3	CCACTCCC
4232950	4233017	21	3	CCGCCACCCATACCCGGCATG
4237469	4237944	120	4	GCGATCGCCAATCTCCTGGCGGATGGCCAGGGCGTCCTGGTAATAGCCCAGGGCCTGCTCATATTGGCCCAGGTTGTCATACACCGCCCCAATGTTGTTGAGGGTGACCCC
4247637	4247715	21	4	GGGACGCAGCCATTTTTAGGC
4249628	4249653	7	4	GAAGGCT
4251720	4251748	14	2	TTTATTGTGAACCT
4257051	4257098	21	2	TGAGGAAGCCGCCATCGACGA
4263087	4263148	8	8	GGAGTGGG
4263172	4263203	7	5	GAAGAGT
4273655	4270678	2977	IS110	aagttttccagggtggttgcgccgccaagctgacggggctggatgtgatcgatggtgaaactatcgggcgagaaggtttctgggcagcggcagtattcacaacgctgctgggctctttaagcaacctctcgccgcctgctgagacaaaatctcccttcgctttatttacccattcctgcgttagtggcttcatgtaaaaccttgccctgctccaatatttcctgaataaagtcattgccgagggctaaacgctgctcaatttgctctggcgttcttgccagcacatcgacagcaaaatcaggatttgtggcgctgagaattgcagatgcgacgcgaaagggatatccctcaaaaggtaaaattaccaataagtctacatctgagtcttccgttggctgc…
4276216	4273669	2547	IS256	gagtgatggtgatttcttccccctcagggagcccatccggaggccatcccctcaatgaaactactcgcctagcaatccggcttgtgcaaacaattgccgtactgtcagggttaagtgagtcagatgctcatctgtcagatggcgactgccacgatatgtcactggcagagcattaggcttgaatacagtaatcgtttttgccgtagggtccacaatccaaacccttgccactccagccatgatgtagtcgacagctttttcagccatgatgccaaaggtttggttggcagaaataatctcaactgccaagtcaaccgggactgggcaggcctgatcgcccaaatcatcaggtaatcgctcggcgtagacaaatgaaacatcaggcacgggtacccaatc…
4289278	4289307	15	2	AGTATCGTCATCACT
4289811	4289845	15	2	ATCCTGCTGACTCTA
4289811	4289853	15	3	ATCCTGCTAACTCTA
4297882	4297907	12	2	CAGCAACAGCAG
4314169	4314197	7	4	TTTTGAA
4314350	4314825	149	3	CGCCCTGGTCGTAGGAGTCCGAGGGGAGCGTAGGGGAAAGGATGAAAGCAGAAGGAAGAAGGCAAAAAAGTCCATCGTGTCCCCGCTGATGCAATGCGATCTTGAACGACC
4318032	4318066	18	2	GATCGAAATCCCCGAAGG
4327570	4327636	15	5	CATGGCTAGCAGATC
4334140	4334164	11	2	GCATCTCCATA
4335034	4338094	3060	IS630	gtcggcctcaccccccagttagaacagccaggggtgaccatcgggttgttgtataagtggttgcctcgattgcatgctgcaggtagcaaagatacccacacaactactgcttaactgtcaggaggcagttaagcaaggaccagaatatgcagctggggttcaaaagcctggtatagcgtcgcagagctttgggccacgggagttgcgctgacgggtaacgctaatgcccacccagaggataaaccattttacctatgaggccaccatctaggcgaagagaagaatcacgaccaagaagccgagagttccaactaaaaaagccggtgtatcgttggactgctgaggtttagatggcggattcagatctcgcttgaagtcgcagctaaggcattggtaggt…
4347174	4347209	12	3	GGTTGATTTTGG
4351205	4351243	7	6	AGAGGGA
4352815	4352854	18	2	ATCCTCGACGCCAACGTC
4359392	4359443	26	2	ATCTAGAGAAGAGCCAATCATTCTAT
4393781	4393833	24	2	GGGGAGATGGGTGGATGGGGTGAT
4393789	4393832	8	5	GGGTGATG
4393862	4393894	14	2	ATTTTAAGGGTTGA
4405469	4405500	15	2	GGCAGTTGCAGACCT
4406544	4406610	21	3	GAGCAGGAACGGCAGCGGGCA
4406874	4406941	21	3	AAAAATGACTGTGTCCCGCCT
4437103	4437141	7	6	TTTTGAA
4437621	4437920	92	3	CGAATCCCGTCAGTCCCGTCTTCCTATGCACAGACCCCAACTTCCGCCTTAGCGGCGACCGTTGCGGGTAAGCCTGCGGCTGGCTACGCCTA
4444458	4444540	41	2	GACGGCAAACTTTTCTACAATACCCTACTCCACCTGACCAT
4445869	4445915	12	4	GATTGAGCCTTG
4466742	4466799	7	8	GAGTGAA
4466854	4466882	14	2	TCCTCCGTTCTCCG
4472667	4472728	7	9	AGGCAGA
4484972	4487243	2271	ISL3	ggcaagaccttcgccaaagatgtcgacatggagaagatcgcccgtcgcacgcctggctttaccggtgccgacctgtctaacttgctcaacgaagcggcaatcctagccgctcggcgcaatctcaccgagatttccatggatgaggtgaatgacgccattgatcgggtgctggccggtcccgagaagaaggatcgggtcatgagcgagaagcgcaaggagctggtagcttatcacgaagctggccatgccctagtgggtgccctcatgcccgactatgacccggtacagaagatcagcatcatcccccgcggtcgggccggtggtctgacctggtttacccccagcgaagatcgcctcgagtctgggctatattcccgctcttacctggagaatcagatg…
4496788	4496825	13	3	CCCTGTGAGCTGC
4516474	4516521	16	3	CGCCCCCCGGTAAACA
4522282	4522360	7	12	GAAGAGT
4522294	4522384	27	3	GTGAAGGGTGAAGAGTGGGGGTGAAGG
4522299	4522373	14	6	GAGTGAAGAGTGGG
4522301	4522373	13	6	GTGAAGAGTGGGG
4522314	4522386	20	4	GTGAAGGGTGGGGGTGAAGG
4522339	4522384	7	7	GGGTGAA
4529994	4530020	13	2	CCTGAAATTCTGG
4533096	4533147	14	4	TTCGTCATTGCCCA
4547231	4547297	13	5	GGCGTTTGACTGG
4549189	4549304	30	4	TCTGCCGACGGCGAGGCGGCTTCCTCGGTT
4559509	4559533	12	2	TCACACCACATC
4572719	4572958	92	3	TCGAAGTCGACGGCGTCTTTGTCCAGGTTTTCCGCCGCAGCTGGTCGAAGTCGACCTTGCCAGACTTATCCAGGTTTTCCTGGCGGATCTCG
4572737	4572911	47	4	TTGTCCAGGTTTTCCTGGCGGAGCTCGTCGAAGTCGACCTTGCCGAC
4592641	4592686	23	2	CGTTCAGGCTCATCCTGAGGTAG
4593944	4593977	17	2	AGTTGTCAAAAATCGGC
4604015	4604055	12	3	GTCTCGACCCAG
4608871	4608900	13	2	CATCCATCCATAT
4617357	4617388	15	2	CAATCTTTACATAGG
4625574	4628943	3369	IS4-ssgr-IS4	gttatcgaggttggggggaaagtcagagcgttgaagctcgaatcggaccgccatgggggtagcggtgcaatcgggattgttgaggtcgtaccactgatcggcgaagtcgttgcggaagctgaaggcgcgatcgccactaaaccgatcgcccaattcttgaataacctgttggcgatagtcaaagctatcgagggcggtgtattcgatggtgaagaggacatcggctattgtgctgaaatcgaatcggttggcagctttgggtaagcgtagttcccacaacgtatcaacgcccataccttcgaagggcaacaacatgtcctgaggctggggcgtgagtttcaaataacccggtggcgttgatggctgccgtcagggctacggactcggggggacgcttaa…
4638812	4638846	9	4	AAAAGGACG
4639730	4639756	14	2	ACCTAAAAAGGCGT
4659347	4659381	13	3	GGCGCTTATCTAA
4663941	4663987	21	2	CGATCGCGTTCTTGCTGAGCC
4665249	4665278	16	2	GGAAAGCGGCGGATCA
4677955	4678115	84	2	CCGCCCAGAAATAGATCAGTACCAGCAAAAAATAGCTGCGTCCCAGAGAAAAGTCTATGGGTCCCGGACAAAAATGGTTGCGTC
4677982	4678113	42	3	AAAAATAGCTGCGTCCCAGAGAAAAGTCTATGGGTCCCGGAC
4679136	4679216	7	12	TCAAAAC
4710967	4711015	21	2	GCTTAAGCATTAGGAGCAAAC
4721654	4718659	2995	IS1	gtacggtgtacactccaacccgtcctgccgccagcacctgctgcaccagctcgcgaccttcggcaatgtaattaacgttccagagggcacggtcctgatcctccaataaaattagatcgccctcaggagacgtgcgagcctctcgccgcgactcctgcagcagcattagggccagcaggccgatcacctcagaactgggcagcagtgccatcaacaatcgccccagtcgaatcgcttcctcagaaagattggcccgggtcagcgacggtccagaggcggcggcatacccctcgttaaatatcagataaatgacctggagcacggtctccaatcgctctggcagctctgggcccgatggcacttgatagggaattttggcatctcgaatcttggccttgg…
4731162	4731209	7	7	GGGAAGA
4734225	4737747	3522	IS66-ssgr-ISBst12	tgctcacgatcgctgggtcaggtgtggtgccgtgagggggcgatcgtccttctcaagcgagtgtttcacctcaaattcatacataccgctcttgcagcagaggtttattttgggaaagccactgtttgatttccgcgagcgttttcatctttcccatgaggcgcgttcctggtcaacgtaagcttgggcctcgatgccatgccagatatctttgccgagtccctctaaccccaaaatgctgcgcttaggtgtttctgtcatgcgacgacgcacgatcgcggctagcgcttccaacaattgccactgctcgtcgggcgtcaactcttcaacttggcaacaaatatcccgataagtcgtcatcgtctttgcacactatctgtttcactaatcatggcatat…
4737142	4737171	15	2	CCTTCACAAGAAACA
4750527	4754016	3489	IS1380	caaaagtgattctaaaaattcctcacgttcatcattggttagatatttgtcaaactttcggcgattgatgacttcaattaattctgtaatggtctccgaagaaatcaatatgtttccatgggccaaagcaaaatagagtgctctgcctggaattgaatccttgaacagaagagcactaaccacagtgttggtatcgaaaacaaaacgcaatttatgactcggctaaaatagcactaaggatttctggagttaagcctcgctcttgagccttacgactaatttcctccatcacttcttcaagaggtctaacttttttgactacctcttttagttttaaatttatcagcaaatcgatctttctgcgatctacttcagatgatgcttcataagcatctgctg…
4777334	4777428	7	14	CTGCCTT
4782661	4782700	7	6	AGAGTGA
4808556	4808611	28	2	GAGGTGCAGACCGACACTGTTAGATCAA
4818421	4818455	18	2	GTGGTCAAGCGCATGGAT
4821556	4821586	15	2	CCAGGGATACTCAGG
4839632	4839676	7	6	GAGTGAC
4839698	4839723	7	4	TGAGTTT
4841916	4841954	13	3	TCTAAATTCAACA
4855005	4855032	10	3	AGTCCTAGTG
4856677	4856731	27	2	TGGCAAGGCTAATTTGCTGGGTTAGGA
4863880	4863917	19	2	AATCATCTTTGATTGAGCG
4864270	4864297	14	2	CCCGTTTGTCGTTG
4866820	4866868	22	2	GGGGAGAGGGAGAGACGGAGAG
4866836	4866865	14	2	GGAGAGAGGGAGAG
4866960	4866995	16	2	GGGTGGGCCAGTGGGT
4874987	4875039	15	4	GTGAGATTGGTGCGG
4889324	4892857	3533	IS66-ssgr-ISBst12	actcctctcaatcgctgagccacgaactgattgtctatttcagaatccccttccctaaagagcctcaagggagcagtacgatgtcacaagaaataattcataaccgatgctaaaacggataaggatattgccgcgaagctaaagcgttggtgaacaaccccggaacattaagaattgtgagtggtctacgatggtaatgatgtcagtatgagcgagagtttagagagcacccggcatcgttcccttagtgaggtcgaagcgttgaccgcagttgtggatcaataagccacgatgacagtaccggaatttctcgctaaagtgccccatcaaactgcttaaaattacctcaactaggtcacaaactgagaatttgagatcacctttaaggcaatccctgcg…
4900963	4901009	24	2	GATCACGCTGAAGGCGAAGCCCAC
4902448	4902494	7	7	GGGGAAT
4906689	4906722	16	2	CCCATCCACCCGCCCA
4917687	4920754	3067	ISKra4-ssgr-ISMich2	gtttgcggtggattcaacaacaggcattgccacccccgtttcacctgagaccagcggattaccgtcagccttagcggggacagcggagcagcgactgttgggctatcaatttagcggccaactagtggagattgatctaaactctgccacccaaacccccatcggtgaacccaccgacctagctgccaccagttttgacgtcctggaggatggtagaggatttattgtgccttttgatgagagtttcaatactcaacaactccatcaaattgacgtaaccacaggagcagccattcctctgggctcatctcaggcggttggcgatgcggttgacaatgcccgcagtactcaactgggcacagccaacccttttgtaattagtctggggtcggttgataa…
4925653	4923087	2566	IS630	accctggaattgcccgccaatgtgcaagatctgggctggtctcccgatggcactcatctagcggtgtcggctcagcaacggattcaaatttgggaaacgtctcgctggatttcccctcgatatgaatgggaactgatggccgccagtcgaatcttaaaatggtcctccgagggagcctatttggcgtcagccaatcaggataacagcgtcggcgtcctcacctgggacaacgtccgtgccctaaagcaatcttcggatcattaagcagatttgcccgctctgctggcagggctgcccggcaaggtgcggcaactcgcctgggccgatgttcctgatgctgatcgctcccccattttggcaaccgccacgtggaacctggttgccatgtggatactgatt…
4926158	4923664	2494	IS630	cttgaattagaatgataatcattatcactttattatggcgtgcgggtcagattttctggcggcaggtcagtccattccattggttcaggctatattatgctctctctcaaatccctggtagaactacaggttcaccgatcgctgtcggagtacattaccgccctggtctggtcgccggtcgggaatagattggcgatcgcttctggggccggggaggtggttctgtggcaagactttcaagaaaccatattgcaggccgccaatggcgcttccattgatgccctagggttttccggggaaggggcagtggttggcggcagccgggcaagccggggcggtgacactctggcggctgtctgctgactcacctgagttggtaaagacgctgacctggggttc…
4935980	4938337	2357	IS3-ssgr-IS150	gctggattgacgaacgggctgtggtgatggaaaccctcaccagcctcaagcgagcaggcgcggatgtaattttgacctactttgccaaggatgtcgccagcttgctgcggcggtaggcagatgaacaacgccatgaatttcctggagtgttgcatcctgcccctaccagatggcacttaccagctccgtcacttgagtggagccgtgtggcagtccagcgatttacagtcctgcctaaagctttgaataccaacagaccagtttgtgactgtgctccaaccgaggggtggcggcataacaagcggcataacaacttgatcagcggccattgtgctgccgggctcattgactgacaaaacctgctagaacccagactatccaaagggtcagggaacctgc…
4947067	4947096	10	3	TCTGTATCTA
4951602	4951734	21	6	CCACCCTTCTGCTGCTCCCGA
4951602	4951734	63	2	CCACCCTTCTGCTGCTCCCGACCACCTCTGTGATGCTCCCGATCACCCTCGTGGTGCATCAGA
4951603	4951721	63	2	CACCCTTCTGCTGCTCCCGACCACCTCTGTGATGCTCCCGATCACCCTCGTGGTGCATCAGAG
4951618	4951796	21	9	CCCGACCACCCTGGTGGTGCA
4951626	4951831	42	5	CCTTTTGCTGCTCCCGACCACCCTGGTGGTGCATCCGAGCAC
4951683	4951839	84	2	CGACCACCCTGATGATGCACCCGAGCACCTTCGTGCTGCTCCCGACCACCTCTTTGGTGCACCCACCCACCTTTTTCGTGTATC
4953487	4950882	2605	IS630	aggtatgctgaattgtccggaataccctcatcccaataccccgccaaaggaataccgagaacacatgaaattaagatctaaacttagtacagaattcgtagtcaaggtggtgatctgcctcacgccagcaaatagaacggaacggacgcagtgattgttcatcggttgagcgatcgcaatccggcgcggcacaactcacctcgcgggtcatcattctcacttcaactcacatcttgcaggggatttaggcgtcgacgtgagctcagccgaacgaggctaaggcaggatataaacggactggtgcaagagctctgttcaaaacactgtctcacagttcatctgctgctagtactgaatggcagaaatgggagtatcctttaggaacccctctcaggacat…
4954083	4951505	2578	IS630	gcgcagatgtcgttctgcctgctcacgcttagcaacgtgctgctgaagctgatggttgatcgcttctagctgggctggactgggcaaatcgagcgctttggggacaatcggaatgagttgaatcgcggtgtagaccgaaatcgctgccgtgagtgctttgatggtgcccgagacccaataagccggatgccacagtgtccaaatggacattaagtgggtggtgccgcaaaacgcaataaacgcggaaaacagtaagaaaatccagtcaaacggaacatccttgcgcttctgaacaaaatagagcaaggtcaagggaatggagtagtaggcgatgccaatcagcgcatctgaaaccacatgtaatccgactagattgggtttccaaagatagcagtgccc…
4970692	4970774	21	4	CAAGAGCGACAGCAGGCCGAG
4973069	4973113	20	2	CAGCAAAAAGGGCTCGGGAG
4973535	4973630	24	4	GCTTGTAGTGAGCGGAGTCGAACT
4973820	4973861	7	6	CTTCACT
4988872	4988908	14	3	GGGGTCTATTCCAT
5011986	5012011	13	2	TATCCGATTCAGG
5024976	5025005	15	2	ATGAATCTTTGCAAA
5032037	5032075	7	6	AGTGAAG
5074199	5074228	15	2	AGTTACCCGAGGACA
5074312	5074348	18	2	GCCCTAGTGAGTCATAAA
5091729	5091761	7	5	GAGTGAC
5091800	5091836	14	3	ACTCTTCACCCTTC
5091803	5091836	7	5	CTTCACC
5091803	5091844	21	2	CTTCACCCTTCACTCCCCACC
5093749	5093779	7	4	ACTCGTC
5094516	5094550	16	2	ACCCCATCACCCCCCC
5097259	5097398	63	2	TGAGCGGTCCCCATAGAGTTTTCTCTGGGCCGCAGACATTTCTCTGCGGTACTCATCTATAGC
5098746	5098777	7	5	GAGTGAC
5098746	5098786	21	2	GAGTGACGAGTAAAGAGTGAC
5098747	5098792	21	2	AGTGACGAGTAAAGAGTGACA
5098753	5098786	14	2	GAGTGACGAGTAAA
5101295	5101341	9	5	GGCTGCATC
5111254	5111501	96	3	ATCGCTGATTCAAATGCCCGAGCCATCGCCGCCGGGGCCGAGGAAACCCGCCAACTTCGGCAAAGCTTGCAAGCCTCTATCCAAGAAACACAGCAC
5122346	5122384	11	4	AAAACTTGTGG
5175656	5175685	8	4	GGGGGAGA
5175685	5175717	15	2	AAGGCAGAAGTCAGA
5182932	5182989	7	8	GAGGGCG
5182932	5182989	27	2	GAGGGGGAGGACGGAGGGCGGAGAGCG
5182988	5183064	7	11	AGAGTGA
5182988	5183064	35	2	AGAGTGAAGAGTGAAGAGTGAAGGGTGAAGGGTGA
5182994	5183064	28	3	AAGAGTGAAGAGTGAAGAGTGAAGGGTG
5183061	5183085	8	3	GTGATGGG
5193843	5197212	3369	IS4-ssgr-IS4	attcaacgctgcaacgcctcgtgcaacgccaacgtgagaccccaccggaggcgaagcagacggtcaccgagatcagtgtcgatggcggtaaagtgcgcctgcggcatccggaaaaaggcgaacccagttactggaaagaatacaagagtgctcgggtcgagaatctgtactatggggcggcgtttcaggcaaatgactggctgcaagactggctaaatagccaaccgttagcgaaccccatcatctgccttggcgatgggcatcggggcgtctgggcggtgtttcgtcccatcgccaccgtggaaacccgtttagaaattctcgattggtaccacttggtcgaaaacctctatggagttgggggctcattaaaacggctgaaacaagccaaagctctgt…
5200449	5200486	21	2	TCTTCGTAGTTCTCTAGGGCC
5217766	5217799	7	5	GGAGGAC
5228845	5229058	7	31	CTTCTGC
5232918	5232954	12	3	CGTCACCTACCG
5252141	5252165	12	2	TAAGGCGAAGAG
5255385	5255537	48	3	GATGACGACGATGACCTAGGCGATGATGACCTAGGCGACGATGACGAC
5255388	5255527	33	4	GACGACGATGACCTAGGCGATGATGACCTAGGC
5255390	5255531	15	9	CGACGATGACCTAGG
5255390	5255531	33	4	CGACGATGACCTAGGCGATGACGATGACCTAGG
5255420	5255447	9	3	CGACGATGA
5259712	5259742	15	2	GAGGTCTCATCTGTA
5261146	5261183	15	3	AGATTGGCCCCCTGC
5268622	5268669	13	4	AGATCACAGTTTG
5269752	5269799	7	7	TGAAGGA
5269808	5269841	14	2	TTACTCGTCACTCG
5281589	5281623	18	2	ACTAGCGAGCTCGGCAGC
5307759	5307785	13	2	GAGACTATCTTTA
5316691	5316727	15	3	GCCGCCGCCGTGGGG
5327047	5327071	13	2	CAGCACCAATAGC
5342061	5342091	14	2	TGTTGAGTTCCTAG
5342445	5342494	7	7	CATCACT
5342445	5342494	14	4	CATCACTCGTCACT
5353509	5353533	7	4	AGTGACG
5353531	5353555	8	3	GTGGATGG
5368152	5368184	9	4	GGAAGCAGA
5374880	5374909	15	2	ATTGAAGAGAGGTTA
5387406	5387438	16	2	TGCATGTCTTTAAAGC
5400243	5400271	13	2	AGCTGCTGGATAA
5405387	5405532	45	3	GTCGAAGTTGACGGCGTCCTTATCCAGGTTTTCCTCGCGCAGTTC
5421400	5421428	7	4	TTTGAAT
5433586	5433628	21	2	ATTACTCGTCACTGACTACTC
5436071	5436098	14	2	ATCAGAGGTGCTGC
5436716	5436774	9	7	TGATGGCGG
5436716	5436774	27	2	TGATGGCGGCGATGGCGGCGACGGCGG
5452089	5452306	24	9	AACTACTTGTGATGAGCGAAGTCG
5485382	5485453	7	10	AAGGCAG
5497808	5497841	17	2	TATGAGCATAGGATCTC
5499872	5499901	15	2	CTGTCTTTTGCCATA
5502612	5502972	120	3	GCTAAGGCTTGCTGATGGAAATCAATGGCCCGCTCATATTGCCCCAAGAAACTGTAGCTACCGCCCAAATTGTCCAAGGCATAGGCCTCCTCCCGGCTGTCGCCGATGTCA
5502613	5502900	120	2	CTAAGGCTTGCTGATGGAAATCAATGGCCCGCTCATATTGCCCCAAGAGACTGTAGGTATTACCTAGAGTGTCCAAGGCATAGGCCTCTCCCCAACGGTCGCCGATGTCGC
5503211	5503249	21	2	GGCTAATAGCCTGCTCATAGA
5503359	5503609	123	2	GCCTGCTCATATTGTCCGAGTCTGTTGTATCGAAGGCCCAAGTTATATAAGGCAGCAGCTTCTCGCTGGCGACTTTCCTCAGGAAATGCTTCGCGAACCCTAGGCTCTCGA
5503776	5506947	3171	IS4-ssgr-IS10	aggcggtggcggcgactaaaccgagtagcttggctgggtaacgcatgggagttcgttccagtcctgggggttgacaccaggatatatgtctgagccggggggagttattcaggtttgtggcgttttgtgaagaggagggagcttgccccgagcggaggcgaggggggagtggggagtgggggagtgaggagaggggggggatggggagatagggggatatggaggggcttgctgtgagcggagtcgaaaccagcgggttcagaactgtcctgcagcacaaacgtggcctgccagaaatgctacgcaagcatcccctacaggctgtcgtgtgatctaaagcttatctgggtcaactcccagctctcgaagcttagccgccagaatctcattgcgctgccg…
5503937	5503992	18	3	AGGGGGGAGTGGGGAGAT
5530335	5530359	12	2	CCATTAACCCCT
5564883	5564910	14	2	GCAATATTCTCTGT
5570421	5570452	7	5	AATTCAA
